# Supplementary material
Source: publisher site journal article supplement (https://www.dovepress.com/article/323998)
Supplement: Supplementary file 1 [file get_supplementary_file.php]

**Table S1** Characteristics of patients with RRD treated during the three waves of the COVID pandemic and in corresponding months of 2019

|                            | 1 <sup>st</sup> year of COVID<br>(March 2020 – February 2021) |               |       | Wave 1<br>(Mar 2020 – May 2020) |                |        | Wave 2<br>(Oct 2020 – Dec 2020) |               |        | Wave 3<br>(Mar 2021 – Apr 2021) |                |        |
|----------------------------|---------------------------------------------------------------|---------------|-------|---------------------------------|----------------|--------|---------------------------------|---------------|--------|---------------------------------|----------------|--------|
|                            | OR / MD                                                       | 95% CI        | p     | OR / MD                         | 95% CI         | p      | OR / MD                         | 95% CI        | p      | OR / MD                         | 95% CI         | p      |
| Sex, Female                | 1.39                                                          | 0.79 to 2.45  | 0.278 | 2.30                            | 0.57 to 10.60  | 0.307  | 1.37                            | 0.38 to 5.02  | 0.772  | 0.91                            | 0.21 to 3.84   | >0.999 |
| Age, years                 | -2.62                                                         | -6.05 to 0.70 | 0.120 | -3.57                           | -10.22 to 3.03 | 0.279  | 1.84                            | -4.97 to 8.18 | 0.626  | -2.24                           | -10.84 to 6.27 | 0.591  |
| Duration of symptoms, days | 1.50                                                          | -2.00 to 3.00 | 0.746 | 5.50                            | -4.00 to 11.00 | 0.499  | 3.00                            | -3.00 to 9.00 | 0.105  | 7.00                            | -5.00 to 16.00 | 0.646  |
| Operated eye, Left         | 0.82                                                          | 0.47 to 1.45  | 0.557 | 0.83                            | 0.21 to 3.27   | >0.999 | 0.98                            | 0.27 to 3.55  | >0.999 | 2.55                            | 0.59 to 12.51  | 0.264  |
| Pre-operative logMAR CDVA  | -0.70                                                         | -3.00 to 1.00 | 0.541 | -0.74                           | -1.18 to 0.21  | 0.179  | 0.00                            | -0.48 to 1.00 | 0.534  | -0.30                           | -1.18 to 1.00  | 0.569  |
| AXL                        | -0.05                                                         | -0.66 to 0.57 | 0.876 | -0.47                           | -1.93 to 0.99  | 0.516  | -1.33                           | -2.75 to 0.08 | 0.064  | -0.45                           | -1.75 to 0.86  | 0.484  |
| Lens status                | -                                                             | -             | 0.645 | -                               | -              | 0.669  | -                               | -             | 0.116  | -                               | -              | >0.999 |
| Macula status, Off         | 0.86                                                          | 0.39 to 1.91  | 0.831 | 0.65                            | 0.09 to 5.08   | 0.676  | 2.13                            | 0.30 to 24.78 | 0.445  | 0.37                            | 0.05 to 2.30   | 0.250  |
| Tamponade, SF6             | 0.71                                                          | 0.40 to 1.26  | 0.268 | 1.23                            | 0.30 to 4.92   | 0.763  | 0.34                            | 0.08 to 1.36  | 0.154  | 0.91                            | 0.21 to 3.85   | >0.999 |

**Notes:** Comparison for 1st year of COVID and each wave was conducted vs. corresponding period of year 2019 (as per Tables 1 and 2). Pre-COVID and COVID populations compared with t-test for age and AXL, Mann-Whitney U test for duration of symptoms and logMAR of operated eye, chi-square test for sex, operated eye, tamponade and with Fisher exact test for lens status and macula.

**Abbreviations:** OR, odds ratio for COVID period vs. pre-COVID period with 95% confidence interval; MD, mean/median difference calculated as COVID period minus pre-COVID period with 95% confidence interval; logMAR, the logarithm of the minimum angle of resolution; CDVA, corrected distance visual acuity; AXL, axial length; SF6, sulphur hexafluoride.

**Table S2** Number of referrals due to rhegmatogenous retinal detachment per month and change versus corresponding month in 2019 (%)

| <b>Month</b> | <b>Number of referrals</b> | <b>Change vs. corresponding month in 2019 (%)</b> |
|--------------|----------------------------|---------------------------------------------------|
| Jan 2019     | 11                         |                                                   |
| Feb 2019     | 12                         |                                                   |
| Mar 2019     | 13                         |                                                   |
| Apr 2019     | 10                         |                                                   |
| May 2019     | 8                          |                                                   |
| Jun 2019     | 6                          |                                                   |
| Jul 2019     | 16                         |                                                   |
| Aug 2019     | 12                         |                                                   |
| Sep 2019     | 9                          |                                                   |
| Oct 2019     | 11                         |                                                   |
| Nov 2019     | 8                          |                                                   |
| Dec 2019     | 8                          |                                                   |
| Jan 2020     | 13                         | 18,2%                                             |
| Feb 2020     | 7                          | -41,7%                                            |
| Mar 2020     | 8                          | -38,5%                                            |
| Apr 2020     | 4                          | -60,0%                                            |
| May 2020     | 4                          | -50,0%                                            |
| Jun 2020     | 15                         | 150,0%                                            |
| Jul 2020     | 14                         | -12,5%                                            |
| Aug 2020     | 7                          | -41,7%                                            |
| Sep 2020     | 9                          | 0,0%                                              |
| Oct 2020     | 9                          | -18,2%                                            |
| Nov 2020     | 9                          | 12,5%                                             |
| Dec 2020     | 4                          | -50,0%                                            |

|          |    |        |
|----------|----|--------|
| Jan 2021 | 13 | 18,2%  |
| Feb 2021 | 8  | -33,3% |
| Mar 2021 | 6  | -53,8% |
| Apr 2021 | 11 | 10,0%  |
| May 2021 | 8  | 0,0%   |
